# Supplementary material for: Rapid Microwave Synthesis, Characterization and Reactivity of Lithium Nitride Hydride, Li4NH
Source: Materials (Basel). 2013 Nov 21;6(11):5410–26. doi: 10.3390/ma6115410 (PMC5452770; doi:10.3390/ma6115410)
Supplement: Supplementary File 1 [file materials-06-05410-s001.pdf]

## Supplementary Information

**Figure S1.** Mass spectra obtained under the conditions shown in Figure 10 (a)  $\text{N}_{2(g)}$ ; and (b)  $\text{H}_2\text{O}$ ,  $\text{NH}_{3(g)}$ , and  $\text{H}_{2(g)}$  were monitored.

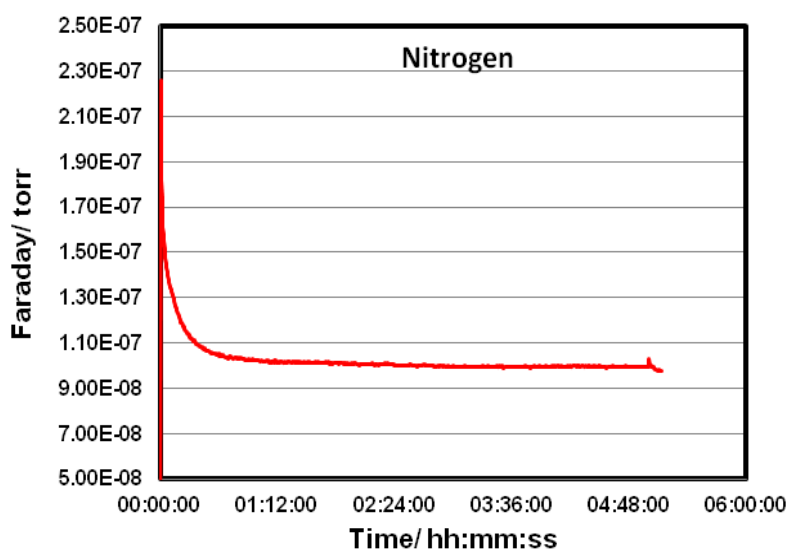

(a)

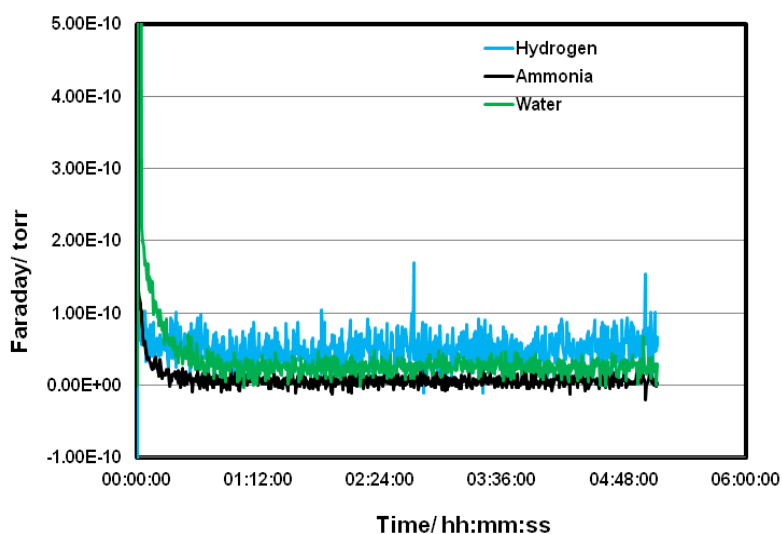

(b)

**Table S1.** Interatomic distances in  $\text{Li}_4\text{NH}$  (LT and HT phase) obtained from Rietveld refinement against PXD data at 298K.

| Interatomic distances/Å | LT- $\text{Li}_4\text{NH}$ (tetragonal)    | HT- $\text{Li}_4\text{NH}$ (Cubic) |
|-------------------------|--------------------------------------------|------------------------------------|
| Li1-(N1,H1)             | $4 \times 2.082(2)$<br>$4 \times 2.044(2)$ | 2.1418(1)                          |
| Li1-(N2,H2)             | $4 \times 1.949(2)$<br>$4 \times 2.556(3)$ |                                    |

**Table S2.** Bond angles in Li<sub>4</sub>NH (LT and HT phases) obtained from Rietveld refinement against PXD data collected at 298 K.

| Bond angles/ °  | LT-Li <sub>4</sub> NH phase<br>(tetragonal) | HT-Li <sub>4</sub> NH phase<br>(cubic) |
|-----------------|---------------------------------------------|----------------------------------------|
| Li1-(N1,H1)-Li1 | 4 × 75.00(5)                                |                                        |
|                 | 4 × 75.34(5)                                |                                        |
|                 | 4 × 122.76(8)                               |                                        |
|                 | 4 × 159.3(1)                                |                                        |
|                 | 2 × 85.3(1)                                 | 3 × 54.736(3)                          |
|                 | 4 × 64.93(8)                                | 3 × 125.264(3)                         |
|                 | 4 × 102.43(4)                               |                                        |
|                 | 1 × 124.7(1)                                |                                        |
| Li1-(N2,H2)-Li1 | 4 × 103.69(6)                               |                                        |
|                 | 2 × 121.8(1)                                |                                        |

*Additional Supplementary Information:*

Short video of SMC MW reaction in progress—experiment.avi.
